# Supplementary material
Source: publisher figshare collection journal article supplement (https://acs.figshare.com/ndownloader/files/3710743)
Supplement: Supplementary file 1 [file 3710743]

## Supporting Information

# Arrangement Modulation of $\pi$ -Stacked Columnar Assemblies of Octadehydrodibenzo[12]annulene: Substituent Effects of Peripheral Thienyl and Phenyl Rings

*Ichiro Hisaki,<sup>†\*</sup> Keisuke Osaka,<sup>†</sup> Nobuaki Ikenaka,<sup>†</sup> Akinori Saeki,<sup>‡</sup> Norimitsu Tohnai,<sup>†</sup> Shu Seki,<sup>‡‡</sup> Mikiji Miyata<sup>§</sup>*

<sup>†</sup> Department of Material and Life Science, Graduate School of Engineering, Osaka University,  
2-1 Yamadaoka, Suita, Osaka 565-0871, Japan.

<sup>‡</sup> Department of Applied Chemistry, Graduate School of Engineering, Osaka University,  
2-1 Yamadaoka, Suita, Osaka 565-0871, Japan.

<sup>§</sup> The Institute of Scientific and Industrial Research, Osaka University,  
8-1 Mihogaoka, Ibaraki, Osaka 567-0047, Japan.

<sup>‡‡</sup> Present address: Department of Molecular Engineering, Graduate School of Engineering, Kyoto University,  
Nishikyo-ku, Kyoto-shi, Kyoto 615-8510, Japan.

## Contents

1. Summary of crystal structures of [12]DBA **1**. (**Figure S1**)
2. Crystal structure of **2-II**(CHCl<sub>3</sub>). (**Figure S2**)
3. Thermal analyses of **2-I**(GF), **2-II**(DMF), **2-II**(THF), and **2-II**(NitroBn). (**Figures S3-S4**)
4. Structural transition of **2-II**(DMF) into **2-I**(GF) by guest desorption. (**Figure S5**)
5. Theoretical calculation on [12]DBAs **1** and **2**. (**Figure S6**)
6. Optical properties of [12]DBAs **1** and **2**. (**Figure S7-S8**)
7. <sup>1</sup>H and <sup>13</sup>C NMR spectra of newly synthesized compounds. (**Figures S9-S18**)

## 1. Summary of crystal structures of [12]DBA 1

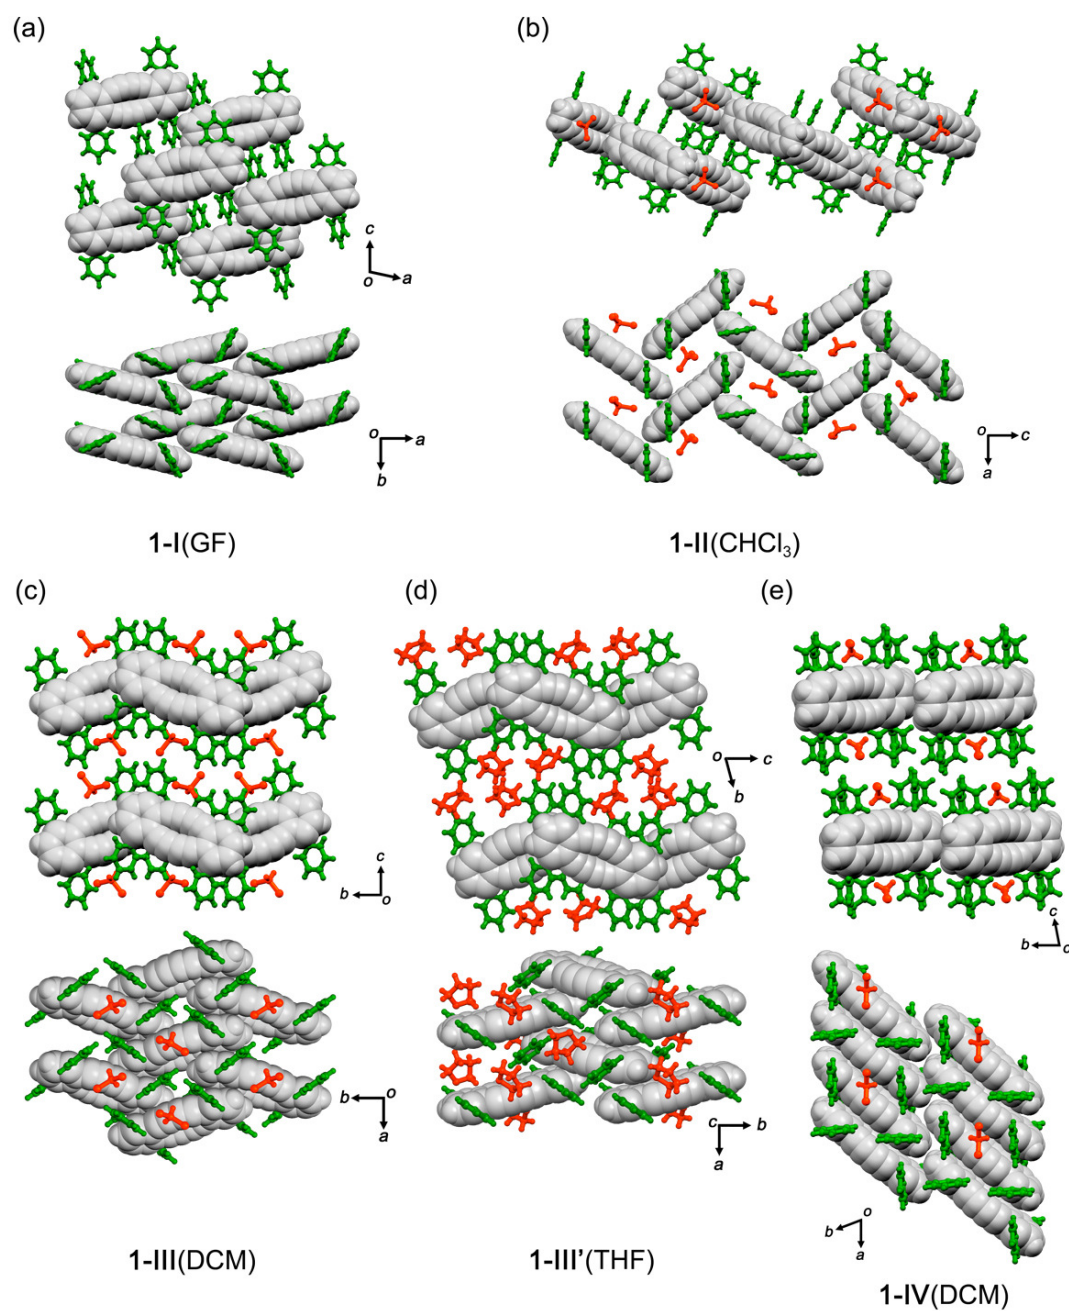

**Figure S1.** Packing diagrams of [12]DBA 1 in crystalline states.

## 2. Crystal structure of 2-II( $\text{CHCl}_3$ )

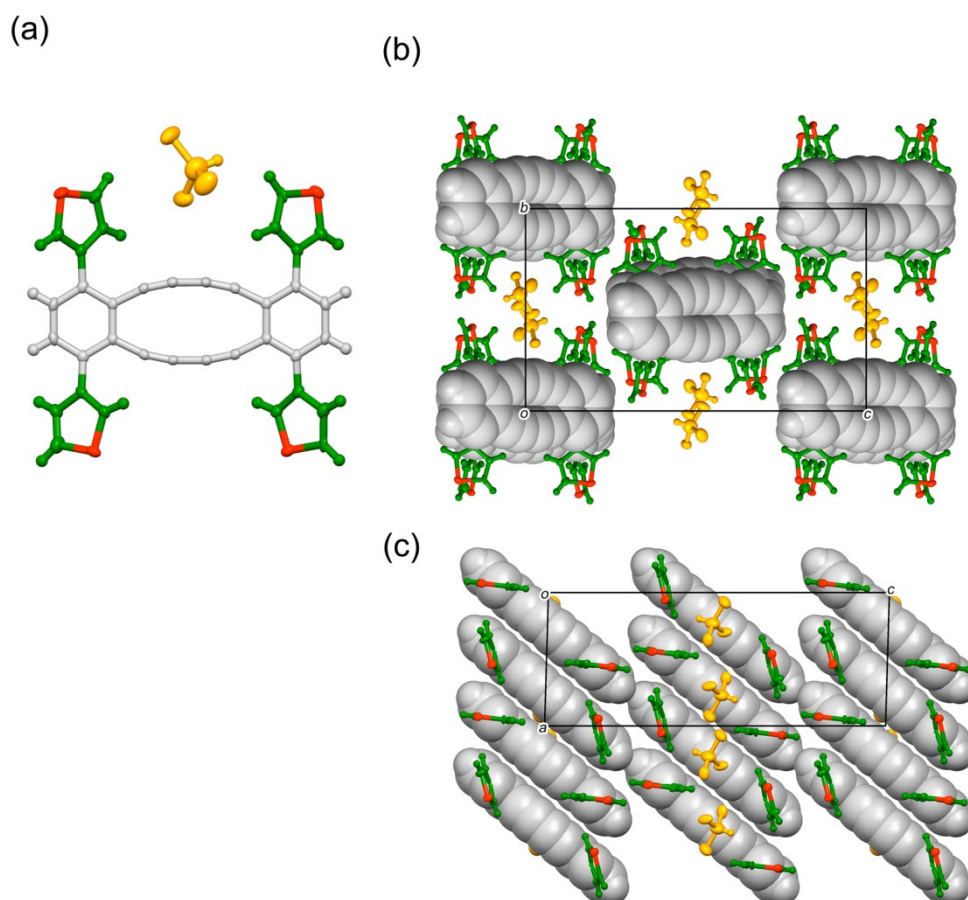

**Figure S2.** Crystal structure of 2-II( $\text{CHCl}_3$ ) (a) Anisotropic displacement ellipsoid plot with 50% probability. (b,c) Packing diagrams viewed from the  $a$  and  $b$  axes, respectively.

### 3. Thermal analyses of 2-I(GF), 2-II(THF), 2-II(DMF), and 2-II(NitroBn)

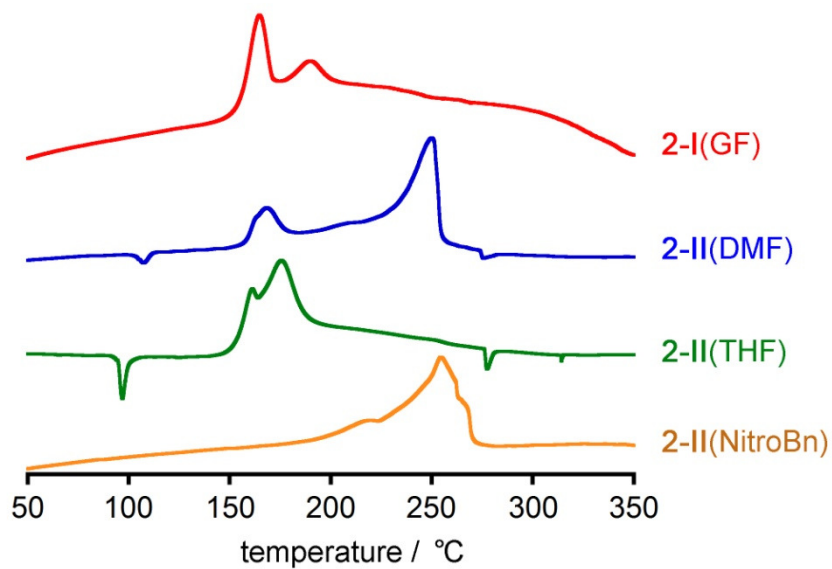

**Figure S3.** Differential scanning calorimetry (DSC) analysis of **2-I(GF)**, **2-II(DMF)**, **2-II(THF)**, and **2-II(NitroBn)**.

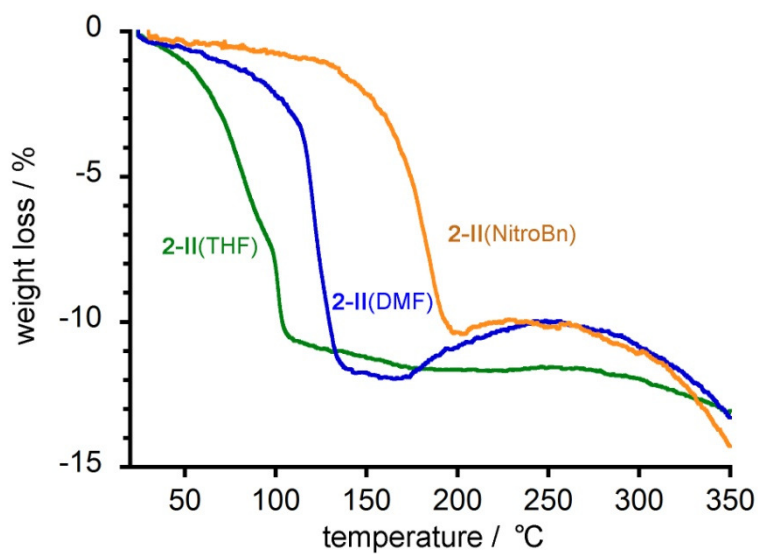

**Figure S4.** Thermal gravimetric (TG) analysis of **2-II(DMF)**, **2-II(THF)**, and **2-II(NitroBn)**.

#### 4. Structural transition of 2-II(DMF) into 2-I(GF) by guest desorption

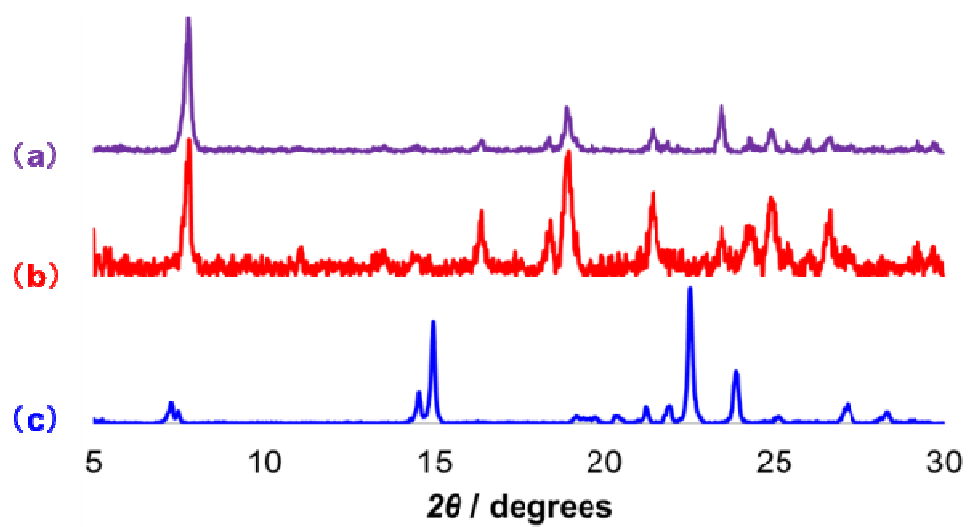

**Figure S5.** Powder X-ray diffraction patterns of (a) **2-I(GF)**, (b) **2-II(DMF)** after guest desorption, and (c) **2-II(DMF)** as formed.

## 5. Theoretical calculation on [12]DBAs 1 and 2

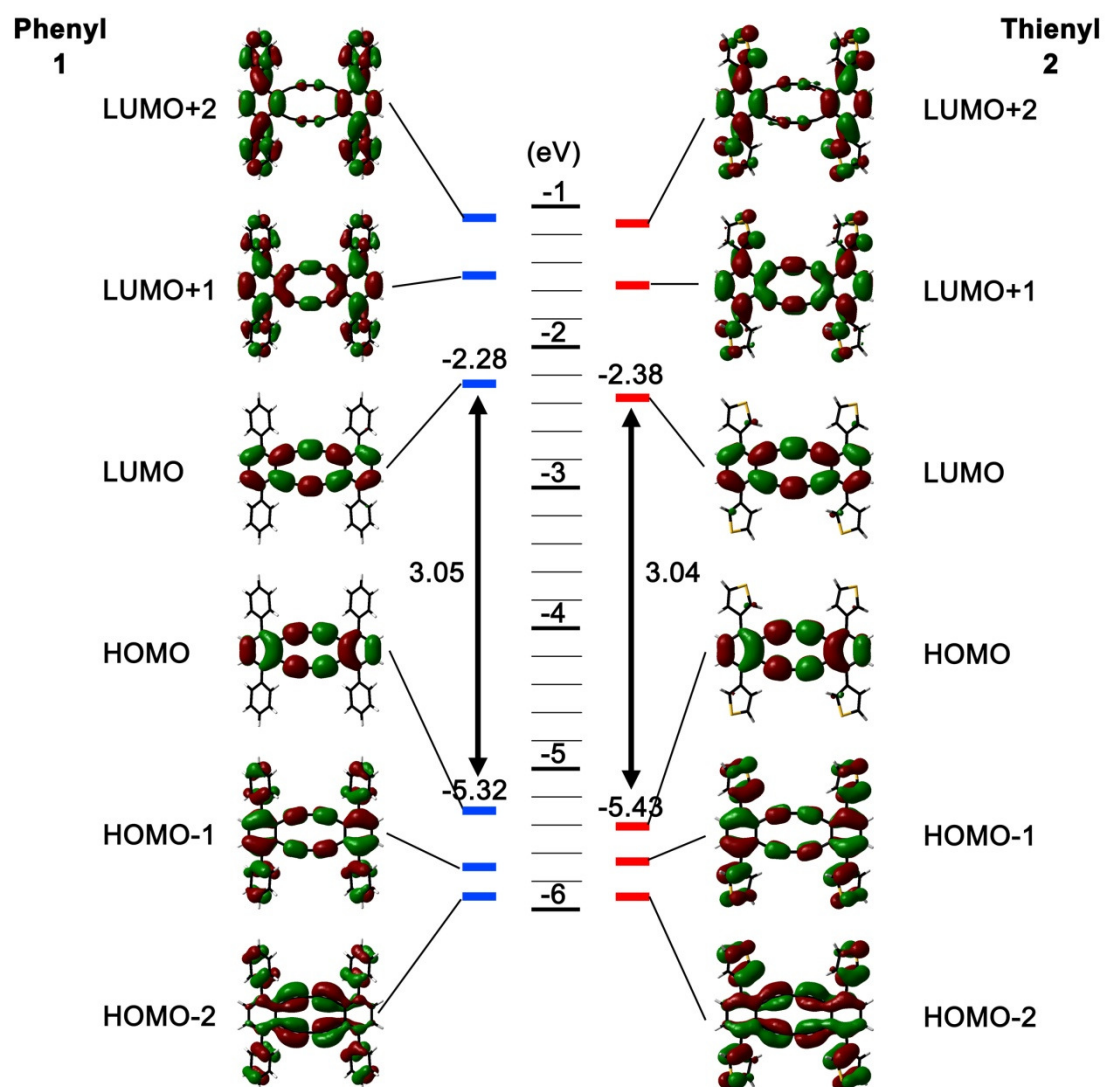

**Figure S6.** Energy levels of selected frontier molecular orbital of [12]DBAs 1 (left) and 2 (right).

## 6. Optical properties of [12]DBAs 1 and 2

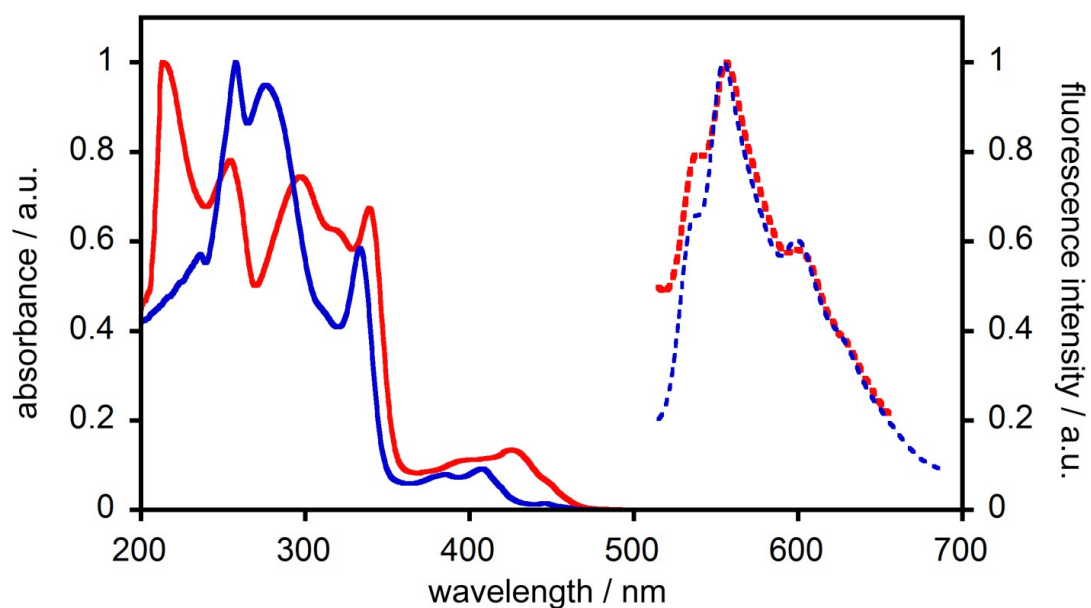

**Figure S7.** UV-vis (solid line) and fluorescence (dash line) spectra of [12]DBAs **1** (blue) and **2** (red) in chloroform. Absorbance and fluorescence intensity are normalized.

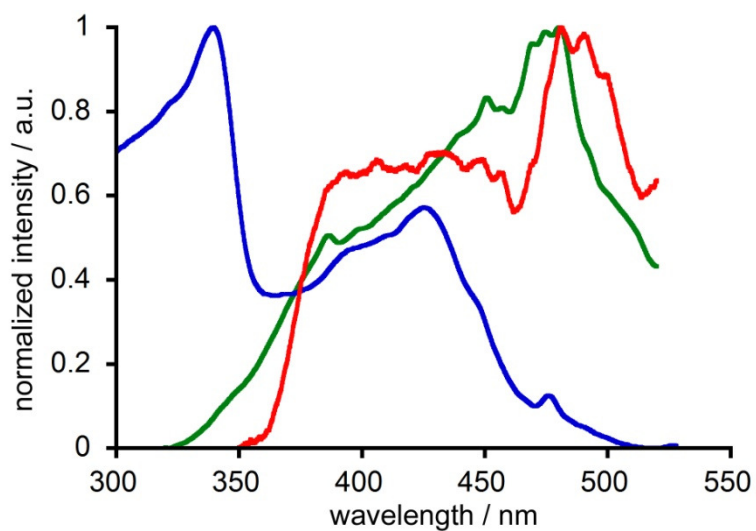

**Figure S8.** Excitation spectra of bulk crystals of **2-I**(GF) (green) and **2-II**(DMF) (red), as well as **2** in chloroform (blue) monitored at fluorescence maximum wavelength.



## 7. $^1\text{H}$ and $^{13}\text{C}$ NMR spectra of newly synthesized compounds

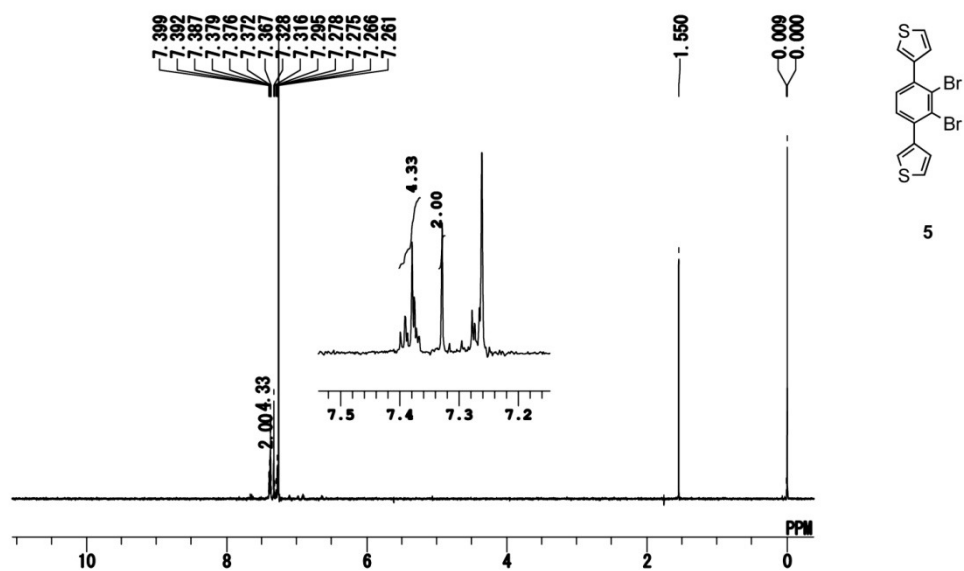

Figure S9.  $^1\text{H}$  NMR (400 MHz,  $\text{CDCl}_3$ ) spectrum of **5**.

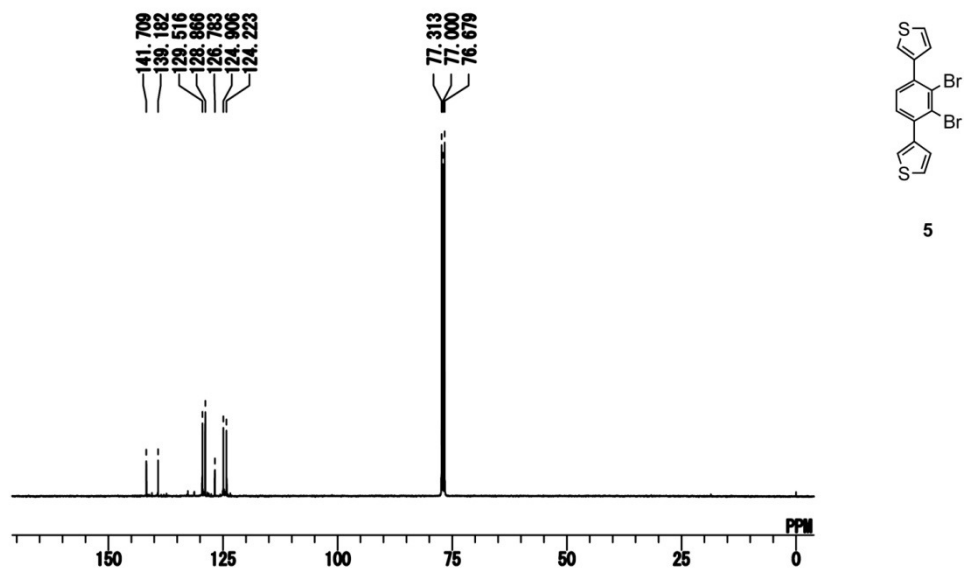

Figure S10.  $^{13}\text{C}$  NMR (100 MHz,  $\text{CDCl}_3$ ) spectrum of **5**.



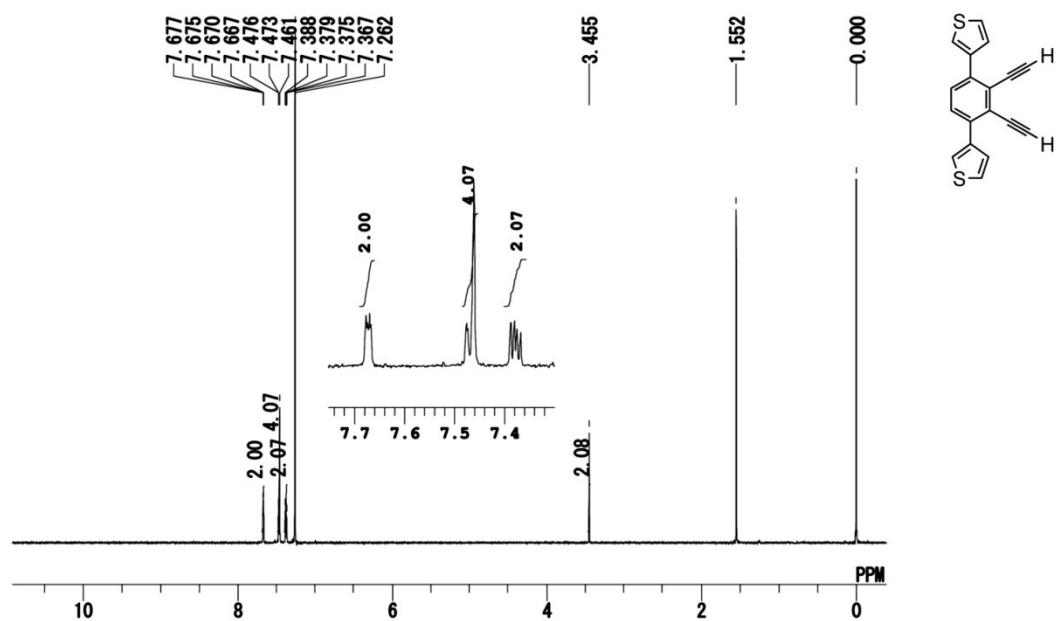

**Figure S13.** <sup>1</sup>H NMR (400 MHz, CDCl<sub>3</sub>) spectrum of the precursor.

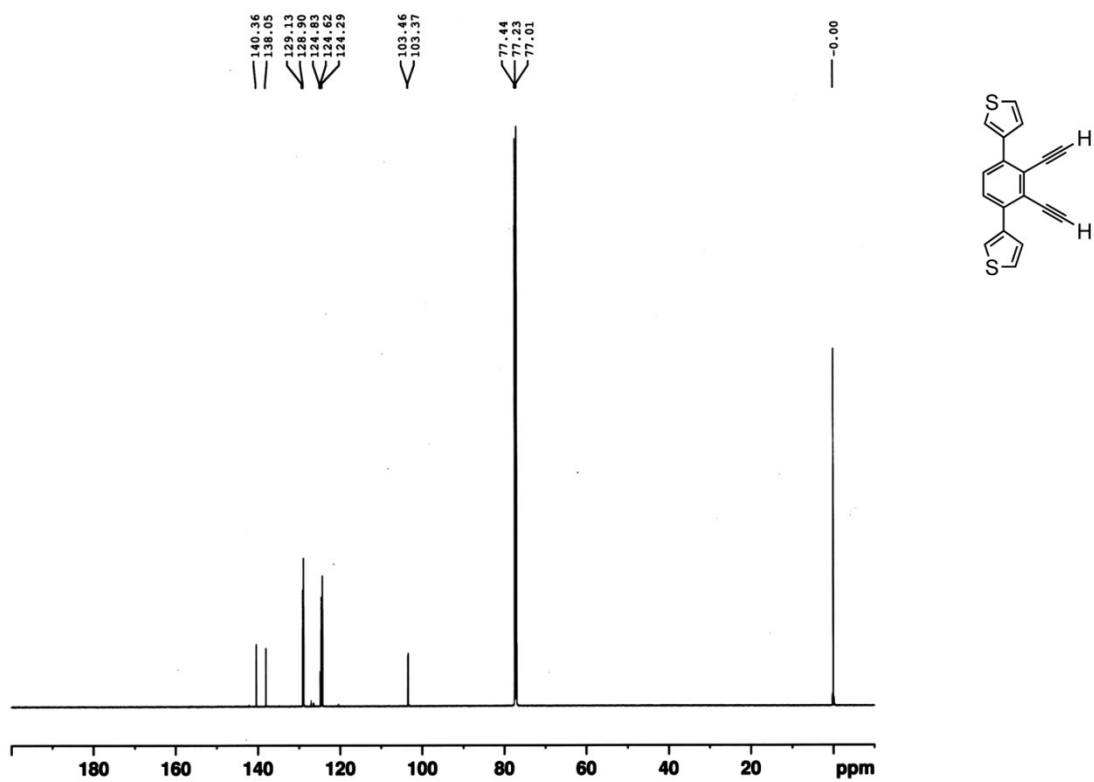

**Figure S14.** <sup>13</sup>C NMR (150 MHz, CDCl<sub>3</sub>) spectrum of the precursor.



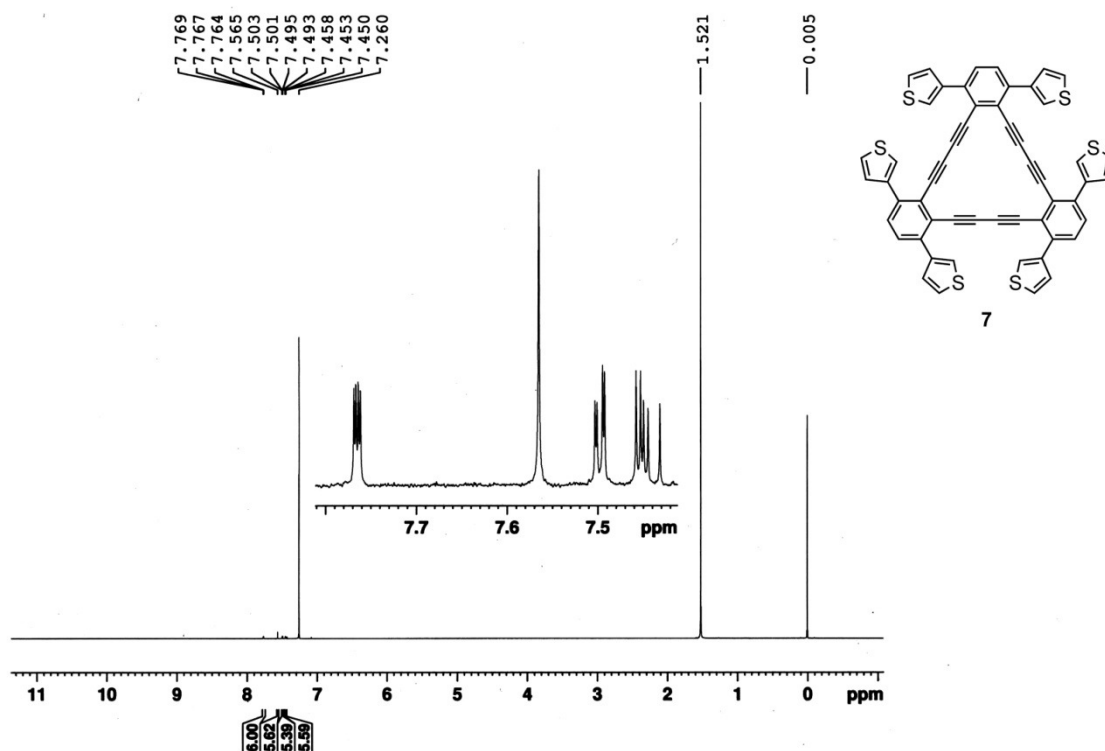

Figure S17. <sup>1</sup>H NMR (600 MHz, CDCl<sub>3</sub>, 40 °C) spectrum of [18]DBA 7.

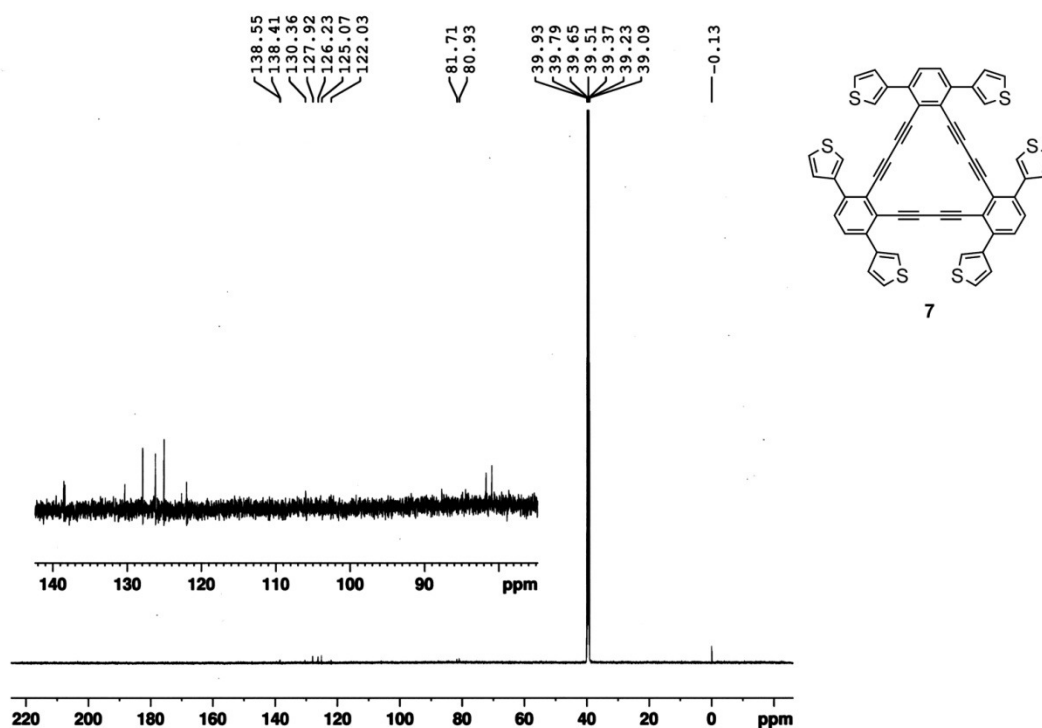

Figure S18. <sup>13</sup>C NMR (150 MHz, DMSO-*d*<sub>6</sub>, 50 °C) spectrum of [18]DBA 7.
